# Supplementary material for: Interventions for HIV prevention and treatment among people of Haitian descent: a scoping review
Source: HighWire-hosted journal article supplement (doi:10.1136/bmjopen-2023-081705), 2024-12-01
Supplement: bmjopen-2023-081705supp002_data_supplement.pdf [file bmjopen-2023-081705supp002_data_supplement.pdf]

**Supplemental Table 2.** Detailed Study Characteristics of Included Studies

| Study                                | Intervention type | Intervention Level           | Sample                                                                                                                                | Outcome(s) of Interest                                                                                                                                                                                                       |
|--------------------------------------|-------------------|------------------------------|---------------------------------------------------------------------------------------------------------------------------------------|------------------------------------------------------------------------------------------------------------------------------------------------------------------------------------------------------------------------------|
| Bardfield 2014 <sup>33</sup>         | Treatment         | Institutional                | 415 clinics                                                                                                                           | ↑ CTX prophylaxis                                                                                                                                                                                                            |
| Berger 2007 <sup>34</sup>            | Treatment         | Institutional                | 9 clinics                                                                                                                             | ↑ efficiency in stock distribution                                                                                                                                                                                           |
| Celeste-Villalvir 2024 <sup>35</sup> | Treatment         | Institutional; Interpersonal | 21 adult clinic patients living with HIV on ART for at least 6 months                                                                 | ↑ psychosocial well-being; ↑ food access; ↑ changes in dietary diversity; ↓ viral load                                                                                                                                       |
| Cleghorn 2007 <sup>36</sup>          | Treatment         | Individual                   | 160 seronegative adults                                                                                                               | ° cellular response; ° anti-gagp24; ↑ anti-gp120                                                                                                                                                                             |
| Currier 2017 <sup>37</sup>           | Treatment         | Individual                   | 1,652 post-partum women living with HIV                                                                                               | ° time to first of AIDS, death, or serious non-AIDS cardio/renal/hepatic condition; ↑ WHO Clinical Stage 4 illnesses, pulmonary tuberculosis, and other serious bacterial infections; ↓ WHO Stage 2 and 3 events; ° toxicity |
| DeMarco 2004 <sup>38</sup>           | Prevention        | Interpersonal                | approximately 45 volunteer participants interested in HIV prevention or members of populations with high incidence rates for HIV/AIDS | Acceptability, feedback                                                                                                                                                                                                      |
| Deschamps 1996 <sup>39</sup>         | Prevention        | Interpersonal                | 177 serodiscordant couples                                                                                                            | ↑ safe sex practices or abstinence                                                                                                                                                                                           |
| Deschamps 2009 <sup>40</sup>         | Prevention        | Individual                   | 348 pregnant women living with HIV                                                                                                    | ↑ adoption of replacement feeding; ↓ likelihood of mixed feeding                                                                                                                                                             |
| Deschamps 2009 <sup>41</sup>         | Prevention        | Individual                   | 348 pregnant women and their infants                                                                                                  | ↓ mother to child transmission                                                                                                                                                                                               |
| Dorvil 2023 <sup>42</sup>            | Treatment         | Individual                   | 500 adults living with HIV that presented with TB symptoms at diagnosis                                                               | ° retention in care; ° viral suppression                                                                                                                                                                                     |
| George 2007 <sup>43</sup>            | Treatment         | Individual                   | 236 treatment-naïve children living with HIV                                                                                          | ↓ viral load; ↑ CD4 count; ↑ weight                                                                                                                                                                                          |
| Gross 2015 <sup>44</sup>             | Treatment         | Interpersonal                | 259 people living with HIV                                                                                                            | ° adherence; ° virologic failure                                                                                                                                                                                             |
| Gross 2019 <sup>45</sup>             | Treatment         | Interpersonal                | 545 people living with HIV on a second-line PI ART regimen                                                                            | ° viral suppression; ↓ virologic failure                                                                                                                                                                                     |
| Guiteau Moise 2018 <sup>46</sup>     | Treatment         | Institutional                | 2361 individuals living with HIV                                                                                                      | ↑ retention in care; ↑ adherence                                                                                                                                                                                             |
| Ichite 2023 <sup>47</sup>            | Prevention        | Institutional                | 38 women on PrEP from a community health center with no major unaddressed mental health issue                                         | ° sexual risk; ↓ alcohol use;                                                                                                                                                                                                |
| Ivers 2014 <sup>48</sup>             | Treatment         | Individual                   | 534 people living with HIV on ART                                                                                                     | ° CD4 count; ° adherence; ° BMI; ° quality of life; ° household wealth                                                                                                                                                       |
| Jayaweera 2003 <sup>49</sup>         | Treatment         | Individual                   | 19 individuals living with HIV                                                                                                        | ↓ viral load; ↑ CD4 count                                                                                                                                                                                                    |
| Jones 2001 <sup>50</sup>             | Prevention        | Individual                   | 178 women (27 Haitian women)                                                                                                          | ↑ N-9 spermicide use, acceptability, and willingness to use products                                                                                                                                                         |
| Kaufman 2012 <sup>51</sup>           | Prevention        | Institutional                | 140 adolescents                                                                                                                       | ↑ HIV knowledge, attitudes, and communication                                                                                                                                                                                |

|                                |                       |                           |                                                                                        |                                                                                                                                                                                                      |
|--------------------------------|-----------------------|---------------------------|----------------------------------------------------------------------------------------|------------------------------------------------------------------------------------------------------------------------------------------------------------------------------------------------------|
| Koenig 2017 <sup>52</sup>      | Treatment             | Individual                | 703 individuals living with HIV                                                        | ↑ retention in care; ↓ viral load                                                                                                                                                                    |
| Logie 2014 <sup>53</sup>       | Prevention            | Individual                | 200 internally displaced women                                                         | ↑ HIV knowledge; ↑ STI knowledge; ↑ condom use; ↓ depression                                                                                                                                         |
| Malow 2009 <sup>54</sup>       | Prevention            | Individual                | 246 Haitian-descent adolescents living in Miami                                        | ↑ HIV knowledge; ↑ condom use intention/attitudes; ↑ safer sex self-efficacy; ↑ ability to use condoms                                                                                               |
| McNairy 2017 <sup>55</sup>     | Treatment             | Institutional             | 9,718 adults who initiated ART within the network of HIV facilities                    | ↑ ART initiation; ↓ mortality                                                                                                                                                                        |
| Mukherjee 2007 <sup>56</sup>   | Prevention; Treatment | Institutional             | n/a                                                                                    | ↑ CHW self-efficacy; ↑ CHW knowledge of HIV/AIDS; ↑ primary healthcare service utilization; ↑ VCT or HIV                                                                                             |
| Naslund 2014 <sup>57</sup>     | Treatment             | Institutional             | 80 adults living with HIV on stable ART for 6+ months without opportunistic infections | ↑ retention in care; ↓ hospital staff workload                                                                                                                                                       |
| Noel 2008 <sup>58</sup>        | Prevention            | Institutional             | 547 pregnant women living with HIV & 551 infants                                       | ↓ vertical transmission; ↓ infant mortality                                                                                                                                                          |
| Parrish 2022 <sup>59</sup>     | Treatment             | Institutional             | 2,1880 ART naïve people living with HIV                                                | ↑ retention in care                                                                                                                                                                                  |
| Patel 2022 <sup>60</sup>       | Prevention            | Institutional             | 576,570 adolescent girls and young women                                               | ↑ PrEP uptake; ° PrEP coverage; ° PrEP to need ratio                                                                                                                                                 |
| Peck 2003 <sup>61</sup>        | Prevention; Treatment | Institutional             | 6,896 adults and 1,279 children receiving voluntary HIV counseling and testing         | ↑ HIV testing; ↑ contraceptive use; ↑ STI management; ↑ TB screening; ↑ medical care                                                                                                                 |
| Preidis 2010 <sup>62</sup>     | Prevention            | Institutional             | 1,500 people from rural villages in Haiti                                              | ↑ HIV/AIDS knowledge; ↑ awareness of HIV testing, counseling, and ART                                                                                                                                |
| Puttkammer 2014 <sup>63</sup>  | Treatment             | Institutional             | 2,510 adults living with HIV                                                           | pharmacy-based proportion of days covered; medication possession ratio                                                                                                                               |
| Puttkammer 2020 <sup>64</sup>  | Treatment             | Institutional; Individual | 874 individuals living with HIV that initiated ART in the past 12 months               | ° viral suppression; ↑ proportion of days covered with medication                                                                                                                                    |
| Reif 2022 <sup>65</sup>        | Treatment             | Individual                | 150 adolescents and young adults living with HIV                                       | ↑ in receipt of VL testing; ° ART adherence; ° viral suppression                                                                                                                                     |
| Rosenberg 2011 <sup>66</sup>   | Prevention            | Individual                | 192 members of a Haitian microfinance program                                          | ↓ partner infidelity; ↑ condom use; ↑ power index score                                                                                                                                              |
| Rosenberg 2019 <sup>67</sup>   | Prevention            | Individual                | 304 member of a Haitian microfinance clients                                           | ↑ condom use; ↓ STI symptoms; ↑ HIV testing                                                                                                                                                          |
| Settergren 2021 <sup>68</sup>  | Treatment             | Interpersonal             | 1,330 children and young children living with HIV                                      | ↑ ART adherence; ↑ viral suppression; health knowledge; retention in care; medication adherence; health knowledge; capacity to deal with peer pressure, stigma, shyness, and depression              |
| Severe 2010 <sup>69</sup>      | Treatment             | Individual                | 816 treatment naïve adults living with HIV                                             | ↓ mortality; ↓ incident TB                                                                                                                                                                           |
| Smith Fawzi 2012 <sup>70</sup> | Treatment             | Individual                | 168 youth living with HIV and 130 of their caregivers                                  | ↓ psychological symptoms (youth); ↑ psychosocial functioning (youth); ↑ social support (youth); ↓ depressive symptoms (caregivers); ↑ social support (caregivers); ↓ HIV-related stigma (caregivers) |

|                         |           |                              |                                                                         |                                                                                           |
|-------------------------|-----------|------------------------------|-------------------------------------------------------------------------|-------------------------------------------------------------------------------------------|
| Wang 2023 <sup>71</sup> | Treatment | Institutional;<br>Individual | 116 adults living with HIV that initiated ART within the last 12 months | ↑ information about ART adherence;<br>↑ motivation for ART adherence; ↓ behavioral skills |
|-------------------------|-----------|------------------------------|-------------------------------------------------------------------------|-------------------------------------------------------------------------------------------|

Note: CTX: cotrimoxazole, ART: antiretroviral therapy, TB: tuberculosis, PI: protease inhibitor, PrEP: pre-exposure prophylaxis, STI: sexually transmitted infection, CHW: community health worker, VCT: voluntary counselling and testing, VL: viral load; ↑ intervention increased outcome effectively, ↓ intervention decreased outcome effectively, ° no real change in outcome
